# Supplementary material for: Harnessing neurovascular interaction to guide axon growth
Source: Sci Rep. 2019 Feb 18;9:2190. doi: 10.1038/s41598-019-38558-y (PMC6379421; doi:10.1038/s41598-019-38558-y)
Supplement: Supplementary file 1 — Supplementary Information [file 41598_2019_38558_MOESM1_ESM.pdf]

## Harnessing neurovascular interaction to guide axon growth

**Authors:** Paul P. Partyka<sup>1</sup>, Ying Jin<sup>2</sup>, Julien Bouyer<sup>2</sup>, Angelica DaSilva<sup>1</sup>, George A. Godsey<sup>3</sup>, Robert G. Nagele<sup>3,4</sup>, Itzhak Fischer<sup>2</sup>, Peter A. Galie<sup>1\*</sup>

**Affiliations:**

<sup>1</sup> Rowan University, Department of Biomedical Engineering, Glassboro, New Jersey 08028, USA.

<sup>2</sup> Drexel University College of Medicine, Department of Neurobiology and Anatomy, Philadelphia, Pennsylvania 19129, USA.

<sup>3</sup> Rowan University, School of Biomedical Sciences, Stratford, New Jersey 08084, USA.

<sup>4</sup> Rowan University, School of Osteopathic Medicine, Stratford, New Jersey 08084, USA.

## SUPPLEMENTAL FIGURE LEGENDS

**Fig. s1.** Microvascular morphology in the cd44KD and blebbistatin conditions compared to controls. Ai) Comparison of microvessel length and Aii) microvessel diameter of cd44KD and blebbistatin conditions to normal day 5 perfused hydrogels. Data are presented as mean  $\pm$  s.e.m. \* $P < 0.05$ ; statistical significance was calculated using Welch Two Sample t-test. Length values ( $n=15$ ) and diameter values ( $n = 5$ ) are from single hydrogel samples per condition.

**Fig. s2.** Transplantation of a scaffold containing 5 mg/mL collagen density. A) Low magnitude image showing a lack of axon infiltration in the location of the transplant following hemisection injury. Scale = 500  $\mu$ m. B) A magnified image of the location denoted with dotted lines in panel A. White arrows show attenuated neurite infiltration labelled by both Tuj and RT97 staining. Scale = 100  $\mu$ m.

**Fig. s3.** A) Regenerating axon (CGRP-positive) infiltration into the transplant three weeks after transplantation. B) Low magnitude image showing the orientation of the transplant relative to host tissue. Scale bars, 50  $\mu$ m (A) and 200  $\mu$ m (B).

**Fig. s4.** Non-cropped blots for Figure 3. Two blots were used to evaluate cd44 expression levels at days 1, 3, 5, and 7 after incubation with siRNA.

**Supplementary Video 1.** 3d rendering of a transplanted scaffold with aligned microvessels within the host tissue, sacrificed 3 weeks-post transplantation. Transplanted cells (green-GFP), host axons (red-anti-Tuj), and cell nuclei (blue-DAPI) are used to visualize the scaffold. The rendering is constructed from confocal stacks of serial 8 micron sections imaged with a laser scanning confocal microscope with a 10x objective.

**Supplementary Video 2.** 3d rendering of a transplanted scaffold with aligned microvessels at 20x magnification. The staining and method of measurement is the same as Supplementary Video 1.

## SUPPLEMENTAL FIGURES

**Fig. s1**

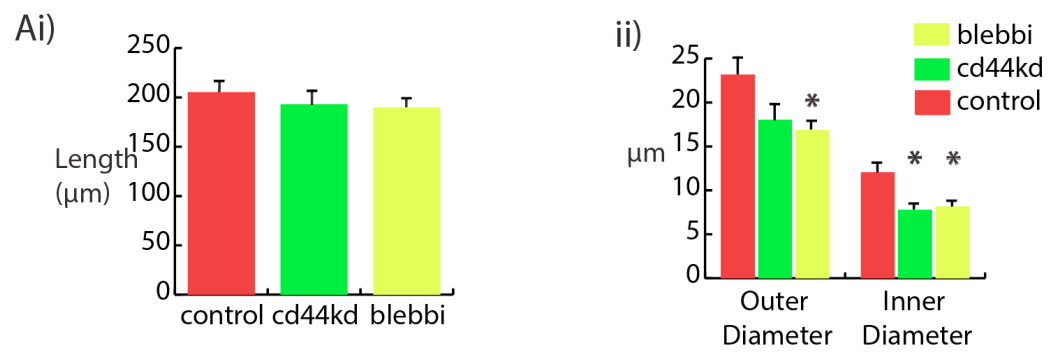

Fig. s2

A

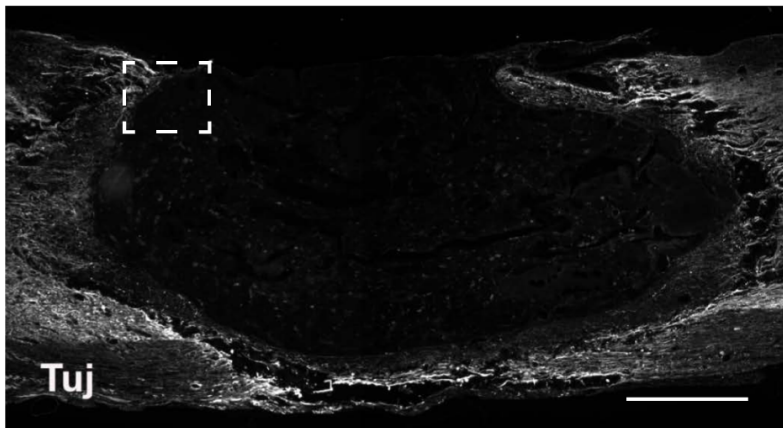

B

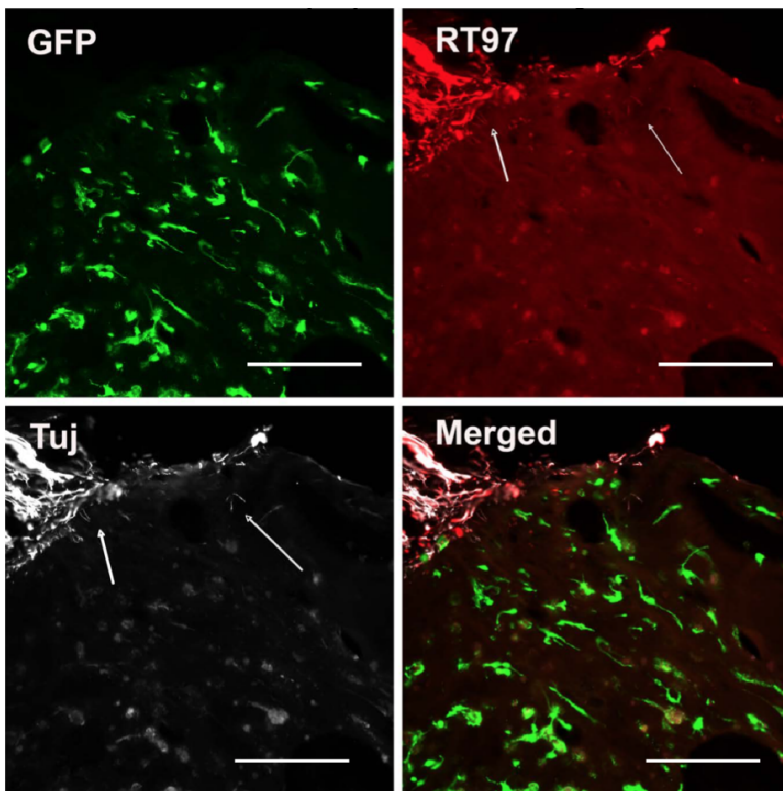

**Fig. s3**

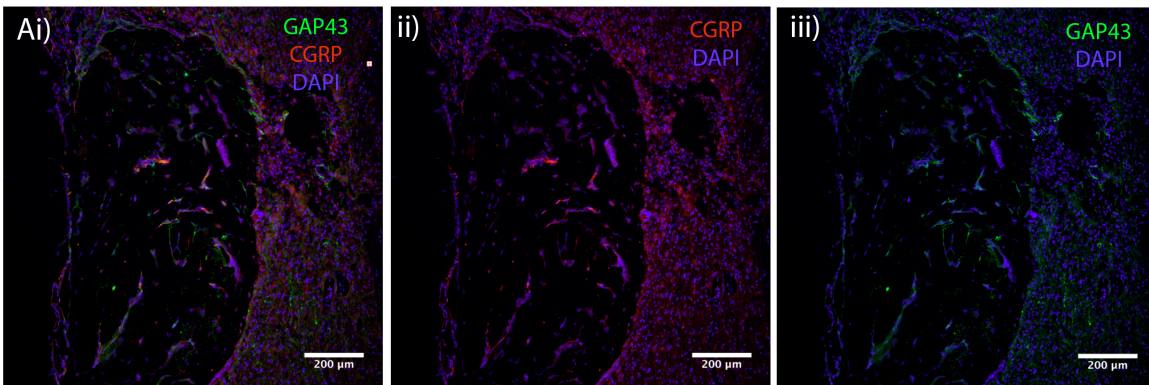

**Fig. s4**

**Blot 1 – anti-cd44**

**(representative lanes highlighted in black)**

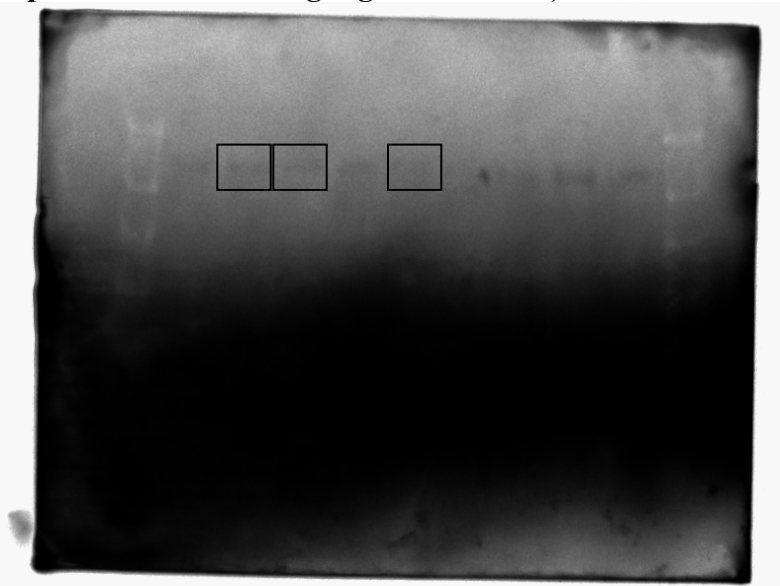

Lanes (1-9): Day1b, Day1a\*, Day5b\*, Day5a, Day3b\*, Day3a, Day3c, Day5c, Day 7a

**Coomassie Blue stain of Gel 1**

**(representative lanes highlighted in white)**

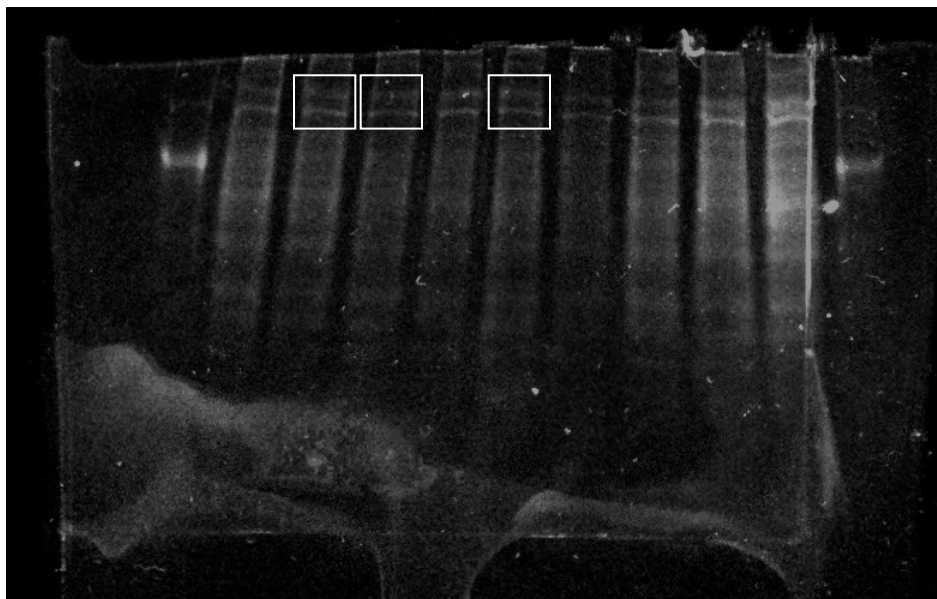

Lanes (1-9): Day1b, Day1a\*, Day5b\*, Day5a, Day3b\*, Day3a, Day3c, Day5c, Day 7a

**Blot 2 – anti-cd44**  
(representative lanes highlighted in black)

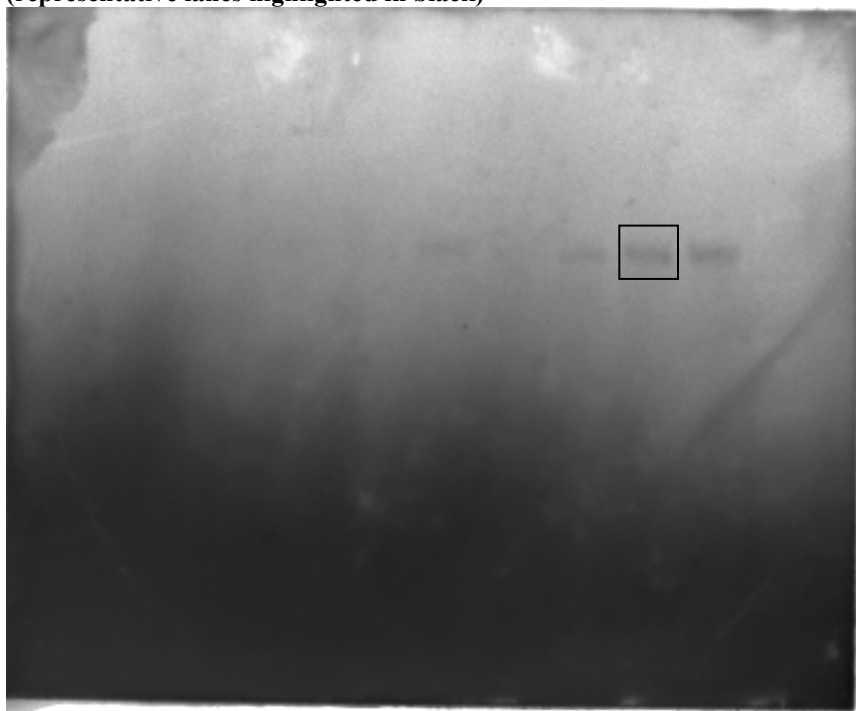

Lanes (1-7): Day3e, Day5d, Day7c, Day3d, Day1c, Day7b\*, Day7a

**Coomassie Blue stain of Gel 2**  
**(representative lanes highlighted in white)**

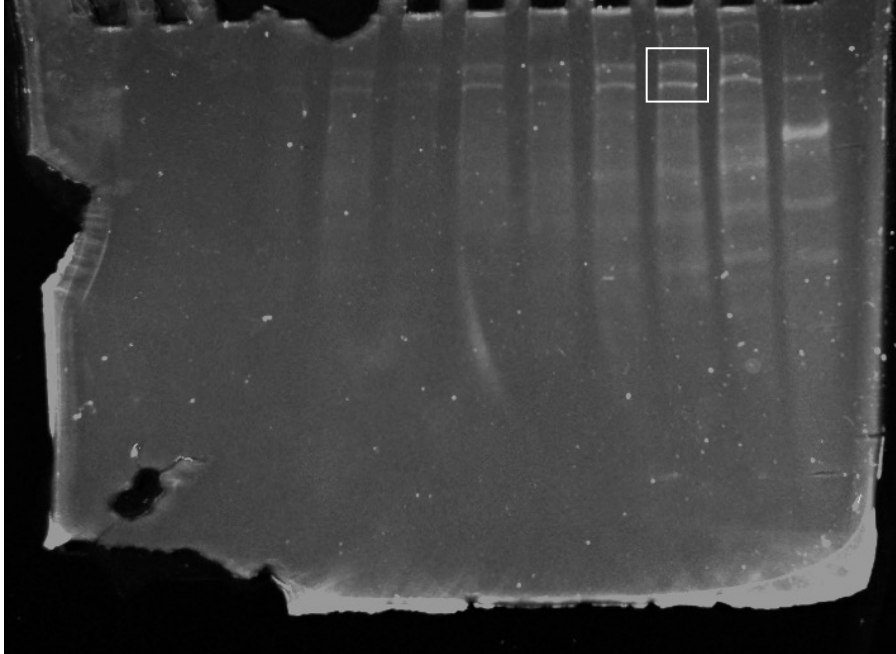

Lanes (1-7): Day3e, Day5d, Day7c, Day3d, Day1c, Day7b\*, Day7a
